# Supplementary material for: Epidemiologic Research of Rare Cancers: Trends, Resources, and Challenges
Source: Oxford University Press journal article supplement (doi:10.1158/1055-9965.epi-20-1796), 2021-04-01
Supplement: 10559965epi201796-sup-257567_2_supp_6933499_qjsqj2.docx [file 10559965epi201796-sup-257567_2_supp_6933499_qjsqj2.docx]

| **Cancer type** | **Search terms (OR search)** |
| --- | --- |
| Oral Cavity & Pharynx | Oral; tongue; salivary gland; mouth; gum%; nasopharynx; nasopharyngeal; tonsil%; oropharynx; oropharyngeal; hypopharynx; hypopharyngeal; pharynx; pharyngeal; "head and neck"; lip% |
| Digestive System | Esophagus; oesophagus; stomach; gastric; intestine; intestinal; rectum; rectal; anal; anus; anorectum; retroperitoneum; peritoneum; liver; hepatocellular; biliary; bile duct; cholangiocarcinoma; hepatoblastoma; pancreas; pancreatic; gall bladder |
| Bone and Joint | Bone; osteosarcoma; chondrosarcoma; ewing%; chordoma; osteoid; osteochondroma |
| Soft Tissue | Sarcoma; heart; soft tissue cancer%; angiosarcoma; fibrosarcoma; rhabdomyosarcoma; liposarcoma; gastrointestinal stromal tumor; GIST |
| Kaposi Sarcoma | Kaposi% |
| Female Genital | Cervix; cervical; hpv; ovary; ovarian; vagina; vaginal; vulva; vulvar; uterus; uterine; endometrial; endometrium; fallopian; gynecologic; gynecological |
| Male Genital | Testis; testes; testicular; penis; penile |
| Urinary Tract | Kidney; renal; ureter; wilms; wilm's |
| Eye | Eye; orbit; uveal; intraocular; ocular; eyelid; adnexal; retinoblastoma |
| Central Nervous System | Glioma; glioblastoma; brain; cns; meningioma; medulloblastoma; astrocytoma; neuroma; chordoma; oligodendroglioma |
| Endocrine | Adrenal; thyroid; parathyroid; pituitary; endocrine |
| Leukemia | "lymphocytic leukemia"; "myeloid leukemia"; "myelogenous leukemia"; "monocytic leukemia"; "acute leukemia"; "lymphoblastic leukemia"; ALL; CLL; AML; "lymphoblastic leukemia"; "monoblastic leukemia"; myeloblastic; megakaryoblastic; myelomonocytic; "neutrophilic leukemia" |
| Lymphoma | Hodgkin%; NHL; non-hodgkin%; "large cell lymphoma"; "small cell lymphoma"; "T-cell lymphoma"; "B-cell lymphoma"; burkitt%; "follicular lymphoma"; "lymphoblastic lymphoma"; myelodysplastic syndrome"; hematologic; hematopoietic |
| Myeloma | Myeloma; MGUS; “monoclonal gammopathy of undetermined significance” |

**Supplementary Table 2. Search Terms utilized to identify rare cancer grants in NCI’s Portfolio Management Application (PMA) system**
