# Supplementary material for: Epidemiologic Research of Rare Cancers: Trends, Resources, and Challenges
Source: Oxford University Press journal article supplement (doi:10.1158/1055-9965.epi-20-1796), 2021-04-01
Supplement: 10559965epi201796-sup-257567_2_supp_6933500_qhsqh2.xlsx [file 10559965epi201796-sup-257567_2_supp_6933500_qhsqh2.xlsx]

## Sheet: Supplementary Table 4
Supplementary Table 3: Availability (Y=Yes, N=No) of data/biospecimens for rare cancers in NIH/NCI resources, by heat map cluster
	TCGA	dbGap	GWAS catalog
Cluster A
Mesothelioma	N	N	Y
Gallbladder	N	Y	Y
Acute Monocytic Leukemia	N	N	N
Nose, nasal cavity, and middle ear	N	N	N
Nasopharynx	N	Y	Y
Floor of mouth	Y	N	N
Larynx	Y	N	Y
Ureter	N	N	N
Retroperitoneum	Y	N	N
Vagina	Y	N	N
Peritoneum, omentum, and mesentery	Y	N	N
Hypopharynx	Y	N	N
Cluster B
Ovary	Y	Y	Y
Cervix	Y	Y	Y
Rectum	Y	N	Y
Chronic lymphocytic leukemia	N	Y	Y
Cluster C
Brain and nervous system	Y	Y	Y
Stomach	Y	Y	Y
Pancreas	Y	Y	Y
Liver and intrahepatic bile duct	Y	Y	Y
Myeloma	N	Y	N
Ill defined and unspecified	N	N	N
Esophagus	Y	Y	Y
Cluster D
Eye and Orbit	Y	Y	Y
Lip	Y	N	N
Kaposi Sarcoma	N	N	N
Penis	N	N	N
Salivary Gland	Y	Y	N
Vulva	Y	N	N
Soft tissue	Y	N	N
Bones and Joints	Y	Y	Y
Small intestine	Y	Y	N
Tongue	Y	N	N
Anus, anal canal, anorectum	N	N	N
Tonsil	Y	N	N
Chronic myeloid leukemia	N	N	Y
Oropharynx	Y	N	Y
Pleura	Y	N	Y
Acute myeloid leukemia	Y	Y	Y
Cluster E
Testis	Y	Y	Y
Acute lymphocytic leukemia	N	N	N
Hodgkin lymphoma	N	N	Y
Non-hodgkin lymphoma	Y	Y	Y
Kidney and renal pelvis	Y	Y	Y
Thyroid	Y	N	Y
TCGA = The Cancer Genome Atlas
dbGap = Database of Genotypes and Phenotypes
GWAS = Genome-Wide Association Studies
